# Supplementary material
Source: ML conference proceedings conference paper supplement (https://openreview.net/forum?id=6NT1a56mNim)
Supplement: supplementary_material [file attachment]

# LANGUAGE MODELS AS ZERO-SHOT PLANNERS: EXTRACTING ACTIONABLE KNOWLEDGE FOR EM- BODIED AGENTS

**Anonymous authors**

Paper under double-blind review

## A APPENDIX

### A.1 EXAMPLE PROGRAM IN VIRTUALHOME

```
[Walk] < living_room > (1)
[Walk] < television > (1)
[Find] < television > (1)
[SwitchOn] < television > (1)
[Find] < sofa > (1)
[Sit] < sofa > (1)
[TurnTo] < television > (1)
[Watch] < television > (1)
```

Table 1: An example program for the activity "Relax on sofa".

### A.2 EXAMPLE PROMPT CONTAINING STEP-BY-STEP INSTRUCTIONS

|                                                                                                                                                                                                                                                                                                                                          |                                                                                                                                                                                                                                    |
|------------------------------------------------------------------------------------------------------------------------------------------------------------------------------------------------------------------------------------------------------------------------------------------------------------------------------------------|------------------------------------------------------------------------------------------------------------------------------------------------------------------------------------------------------------------------------------|
| <p>Task: Read book</p> <p>Description: Walk to home office, turn on light, grab a book, sit in chair, start to read the book.</p> <p>Step 1: Walk to home office</p> <p>Step 2: Walk to light</p> <p>Step 3: Find light</p> <p>Step 4: Switch on light</p> <p>Step 5: Find novel</p> <p>Step 6: Grab novel</p> <p>Step 7: Find chair</p> | <p>Step 8: Sit on chair</p> <p>Step 9: Read novel</p><br><p>Task: Find dictionary</p> <p>Description: Move towards the bookshelf, scan the bookshelf for the dictionary, when the dictionary is found, pick up the dictionary.</p> |
|------------------------------------------------------------------------------------------------------------------------------------------------------------------------------------------------------------------------------------------------------------------------------------------------------------------------------------------|------------------------------------------------------------------------------------------------------------------------------------------------------------------------------------------------------------------------------------|

Figure 1: An example prompt containing step-by-step instructions.

### A.3 HYPERPARAMETER SEARCH

For each evaluated method, we perform grid search over the following hyperparameters:

| Name                   | Description                                                                                               | Search Values        |
|------------------------|-----------------------------------------------------------------------------------------------------------|----------------------|
| epsilon ( $\epsilon$ ) | OOD cutoff threshold used in iterative action translation                                                 | {0, 0.4, 0.8}        |
| temperature            | sampling parameter adjusting relative probabilities across tokens                                         | {0.1, 0.3, 0.6}      |
| k                      | number of samples generated when querying LMs each time                                                   | {1, 10}              |
| frequence_penalty      | OpenAI API specific; penalize new tokens based on their existing frequency in the text so far             | {0.1, 0.3, 0.6, 0.9} |
| presence_penalty       | OpenAI API specific; penalize new tokens based on whether they appear in the text so far                  | {0.3, 0.5, 0.8}      |
| repetition_penalty     | Hugging Face Transformers specific; penalize new tokens based on whether they are repeating existing text | {1.0, 1.2, 1.5, 1.8} |

For methods that use fixed example across evaluated tasks, we search over the following three randomly chosen examples:

| Example 1                                                                                                                                                                                                                                                                                     | Example 2                                                                                                                                                                | Example 3                                                                                                                                                                               |
|-----------------------------------------------------------------------------------------------------------------------------------------------------------------------------------------------------------------------------------------------------------------------------------------------|--------------------------------------------------------------------------------------------------------------------------------------------------------------------------|-----------------------------------------------------------------------------------------------------------------------------------------------------------------------------------------|
| Task: Use computer<br>Step 1: Walk to home office<br>Step 2: Walk to chair<br>Step 3: Find chair<br>Step 4: Sit on chair<br>Step 5: Find computer<br>Step 6: Switch on computer<br>Step 7: Turn to computer<br>Step 8: Look at computer<br>Step 9: Find keyboard<br>Step 10: Type on keyboard | Task: Relax on sofa<br>Step 1: Walk to home office<br>Step 2: Walk to couch<br>Step 3: Find couch<br>Step 4: Sit on couch<br>Step 5: Find pillow<br>Step 6: Lie on couch | Task: Read book<br>Step 1: Walk to home office<br>Step 2: Walk to novel<br>Step 3: Find novel<br>Step 4: Grab novel<br>Step 5: Find chair<br>Step 6: Sit on chair<br>Step 7: Read novel |

#### A.4 RANDOM SAMPLES OF GT, VANILLA CODEX, AND TRANSLATED CODEX

| Annotated Ground-Truth                                                                                                                                                                                                                                                                           | Codex                                                                                                                                                                                                                                                                                            | Translated Codex (Ours)                                                                                                                                                                                                                                                                 |
|--------------------------------------------------------------------------------------------------------------------------------------------------------------------------------------------------------------------------------------------------------------------------------------------------|--------------------------------------------------------------------------------------------------------------------------------------------------------------------------------------------------------------------------------------------------------------------------------------------------|-----------------------------------------------------------------------------------------------------------------------------------------------------------------------------------------------------------------------------------------------------------------------------------------|
| Task: Go to sleep<br>Step 1: Walk to bedroom<br>Step 2: Walk to bed<br>Step 3: Find bed<br>Step 4: Turn to bed<br>Step 5: Look at bed<br>Step 6: Sit on bed<br>Step 7: Sleep                                                                                                                     | Task: Go to sleep<br>Step 1: Walk to bedroom<br>Step 2: Walk to bed<br>Step 3: Find bed<br>Step 4: Sit on bed<br>Step 5: Find pillow<br>Step 6: Sleep on pillow                                                                                                                                  | Task: Go to sleep<br>Step 1: Walk to bedroom<br>Step 2: Walk to bed<br>Step 3: Lie on bed<br>Step 4: Sleep                                                                                                                                                                              |
| Task: Browse internet<br>Step 1: Walk to home office<br>Step 2: Walk to chair<br>Step 3: Find chair<br>Step 4: Sit on chair<br>Step 5: Find computer<br>Step 6: Switch on computer<br>Step 7: Turn to computer<br>Step 8: Look at computer<br>Step 9: Find keyboard<br>Step 10: Type on keyboard | Task: Browse internet<br>Step 1: Walk to home office<br>Step 2: Walk to chair<br>Step 3: Find chair<br>Step 4: Sit on chair<br>Step 5: Find computer<br>Step 6: Switch on computer<br>Step 7: Turn to computer<br>Step 8: Look at computer<br>Step 9: Find keyboard<br>Step 10: Type on keyboard | Task: Browse internet<br>Step 1: Walk to home office<br>Step 2: Walk to desk<br>Step 3: Find chair<br>Step 4: Sit on chair<br>Step 5: Find computer<br>Step 6: Switch on computer<br>Step 7: Find mouse<br>Step 8: Grab mouse<br>Step 9: Turn to computer<br>Step 10: Point at computer |

|                                                                                                                                                                                                                                                                                                                                                                                                                                  |                                                                                                                                                                                                                                                                                                                                                                                                        |                                                                                                                                                                                                                                                                   |
|----------------------------------------------------------------------------------------------------------------------------------------------------------------------------------------------------------------------------------------------------------------------------------------------------------------------------------------------------------------------------------------------------------------------------------|--------------------------------------------------------------------------------------------------------------------------------------------------------------------------------------------------------------------------------------------------------------------------------------------------------------------------------------------------------------------------------------------------------|-------------------------------------------------------------------------------------------------------------------------------------------------------------------------------------------------------------------------------------------------------------------|
| Task: Listen to music<br>Step 1: Walk to bedroom<br>Step 2: Walk to computer<br>Step 3: Find computer<br>Step 4: Turn to computer<br>Step 5: Look at computer<br>Step 6: Walk to computer<br>Step 7: Find chair<br>Step 8: Pull chair<br>Step 9: Sit on chair<br>Step 10: Find headset<br>Step 11: Grab headset<br>Step 12: Put on headset<br>Step 13: Switch on computer<br>Step 14: Find keyboard<br>Step 15: Type on keyboard | Task: Listen to music<br>Step 1: Walk to home office<br>Step 2: Walk to chair<br>Step 3: Find chair<br>Step 4: Sit on chair<br>Step 5: Find computer<br>Step 6: Switch on computer<br>Step 7: Turn to computer<br>Step 8: Look at computer<br>Step 9: Find keyboard<br>Step 10: Type on keyboard                                                                                                       | Task: Listen to music<br>Step 1: Walk to home office<br>Step 2: Walk to computer<br>Step 3: Sit on chair<br>Step 4: Switch on computer<br>Step 5: Find music stand                                                                                                |
| Task: Brush teeth<br>Step 1: Walk to bathroom<br>Step 2: Walk to tooth paste<br>Step 3: Find tooth paste<br>Step 4: Grab tooth paste<br>Step 5: Find toothbrush<br>Step 6: Grab toothbrush                                                                                                                                                                                                                                       | Task: Brush teeth<br>Step 1: Walk to bathroom<br>Step 2: Walk to sink<br>Step 3: Find toothbrush<br>Step 4: Pick up toothbrush<br>Step 5: Put toothbrush in mouth<br>Step 6: Move brush around mouth for two minutes<br>Step 7: Spit out toothpaste and brush into sink<br>Step 8: Turn on water in sink and rinse brush for one minute<br>Step 9: Turn off water in sink and return brush to cupboard | Task: Brush teeth<br>Step 1: Walk to bathroom<br>Step 2: Open door<br>Step 3: Walk to sink<br>Step 4: Put pot on sink<br>Step 5: Put brush on toothbrush<br>Step 6: Turn to toothpaste<br>Step 7: Put toothpaste on toothbrush<br>Step 8: Put teeth on toothbrush |
| Task: Dry soap bottles<br>Step 1: Find towel<br>Step 2: Find soap<br>Step 3: Grab soap<br>Step 4: Wipe soap<br>Step 5: Put back soap<br>Step 6: Find shampoo<br>Step 7: Grab shampoo<br>Step 8: Wipe shampoo<br>Step 9: Put back shampoo<br>Step 10: Find shampoo<br>Step 11: Grab shampoo<br>Step 12: Wipe shampoo<br>Step 13: Put back shampoo                                                                                 | Task: Dry soap bottles<br>Step 1: Walk to kitchen<br>Step 2: Walk to sink<br>Step 3: Find sink<br>Step 4: Turn on water tap<br>Step 5: Wait for water to be hot enough<br>Step 6: Fill container with hot water<br>Step 7: Find soap bottles<br>Step 8: Pour soap into container with hot water<br>Step 9: Wait for soap to dissolve in water<br>Step 10: Turn off tap and empty container into sink   | Task: Dry soap bottles<br>Step 1: Walk to bathroom<br>Step 2: Walk to shower<br>Step 3: Find soap                                                                                                                                                                 |

|                                                                                                                                                                                                                                                                                                                                                                                                                                                                                                  |                                                                                                                                                                                                                                                                                               |                                                                                                                                                                                                                                                                                                                                  |
|--------------------------------------------------------------------------------------------------------------------------------------------------------------------------------------------------------------------------------------------------------------------------------------------------------------------------------------------------------------------------------------------------------------------------------------------------------------------------------------------------|-----------------------------------------------------------------------------------------------------------------------------------------------------------------------------------------------------------------------------------------------------------------------------------------------|----------------------------------------------------------------------------------------------------------------------------------------------------------------------------------------------------------------------------------------------------------------------------------------------------------------------------------|
| Task: Vacuum<br>Step 1: Walk to home office<br>Step 2: Walk to computer<br>Step 3: Find vacuum cleaner<br>Step 4: Switch on vacuum cleaner<br>Step 5: Switch off vacuum cleaner                                                                                                                                                                                                                                                                                                                  | Task: Vacuum<br>Step 1: Walk to hallway<br>Step 2: Walk to closet<br>Step 3: Find closet<br>Step 4: Open closet<br>Step 5: Find vacuum cleaner<br>Step 6: Turn on vacuum cleaner<br>Step 7: Walk to living room<br>Step 8: Vacuum floor in living room                                        | Task: Vacuum<br>Step 1: Walk to home office<br>Step 2: Walk to dresser<br>Step 3: Open dresser<br>Step 4: Find vacuum cleaner<br>Step 5: Grab vacuum cleaner<br>Step 6: Pull vacuum cleaner<br>Step 7: Plug in vacuum cleaner<br>Step 8: Switch on vacuum cleaner<br>Step 9: Pull vacuum cleaner<br>Step 10: Push vacuum cleaner |
| Task: Find dictionary<br>Step 1: Walk to home office<br>Step 2: Walk to bookshelf<br>Step 3: Turn to bookshelf<br>Step 4: Look at bookshelf<br>Step 5: Turn to bookshelf<br>Step 6: Look at bookshelf<br>Step 7: Turn to bookshelf<br>Step 8: Look at bookshelf<br>Step 9: Turn to bookshelf<br>Step 10: Look at bookshelf<br>Step 11: Turn to bookshelf<br>Step 12: Look at bookshelf<br>Step 13: Turn to bookshelf<br>Step 14: Look at bookshelf<br>Step 15: Find novel<br>Step 16: Grab novel | Task: Find dictionary<br>Step 1: Walk to home office<br>Step 2: Walk to chair<br>Step 3: Find chair<br>Step 4: Sit on chair<br>Step 5: Find dictionary<br>Step 6: Open dictionary<br>Step 7: Look at dictionary                                                                               | Task: Find dictionary<br>Step 1: Walk to home office<br>Step 2: Walk to book<br>Step 3: Find textbook                                                                                                                                                                                                                            |
| Task: Wash monitor<br>Step 1: Walk to home office<br>Step 2: Walk to computer<br>Step 3: Find computer<br>Step 4: Turn to computer<br>Step 5: Look at computer<br>Step 6: Switch off computer<br>Step 7: Find brush<br>Step 8: Turn to brush<br>Step 9: Look at brush<br>Step 10: Grab brush<br>Step 11: Wipe computer<br>Step 12: Drop brush<br>Step 13: Find napkin<br>Step 14: Grab napkin<br>Step 15: Wash napkin<br>Step 16: Wipe computer                                                  | Task: Wash monitor<br>Step 1: Walk to home office<br>Step 2: Walk to chair<br>Step 3: Find chair<br>Step 4: Sit on chair<br>Step 5: Find computer<br>Step 6: Switch on computer<br>Step 7: Turn to computer<br>Step 8: Look at computer<br>Step 9: Find keyboard<br>Step 10: Type on keyboard | Task: Wash monitor<br>Step 1: Walk to check<br>Step 2: Walk to desk                                                                                                                                                                                                                                                              |
| Task: Read newspaper<br>Step 1: Walk to home office<br>Step 2: Walk to chair<br>Step 3: Find chair<br>Step 4: Sit on chair<br>Step 5: Find newspaper<br>Step 6: Grab newspaper<br>Step 7: Open newspaper<br>Step 8: Read newspaper                                                                                                                                                                                                                                                               | Task: Read newspaper<br>Step 1: Walk to home office<br>Step 2: Walk to chair<br>Step 3: Find chair<br>Step 4: Sit on chair<br>Step 5: Find newspaper<br>Step 6: Open newspaper<br>Step 7: Read newspaper                                                                                      | Task: Read newspaper<br>Step 1: Walk to home office<br>Step 2: Walk to chair<br>Step 3: Find chair<br>Step 4: Sit on chair<br>Step 5: Find newspaper<br>Step 6: Grab newspaper<br>Step 7: Read newspaper                                                                                                                         |

|                                                                                                                                                                                                                                                                                                                                                                                               |                                                                                                                                                                                                                                                                                               |                                                                                                                                                                                                                                                                                                                              |
|-----------------------------------------------------------------------------------------------------------------------------------------------------------------------------------------------------------------------------------------------------------------------------------------------------------------------------------------------------------------------------------------------|-----------------------------------------------------------------------------------------------------------------------------------------------------------------------------------------------------------------------------------------------------------------------------------------------|------------------------------------------------------------------------------------------------------------------------------------------------------------------------------------------------------------------------------------------------------------------------------------------------------------------------------|
| Task: Apply lotion<br>Step 1: Find bed<br>Step 2: Turn to bed<br>Step 3: Point at bed<br>Step 4: Wash bed<br>Step 5: Turn to bed<br>Step 6: Look at bed<br>Step 7: Push bed<br>Step 8: Sit on bed                                                                                                                                                                                             | Task: Apply lotion<br>Step 1: Walk to bathroom<br>Step 2: Walk to cabinet<br>Step 3: Open cabinet<br>Step 4: Find lotion<br>Step 5: Apply lotion on hands<br>Step 6: Rub hands together for 10 seconds<br>Step 7: Apply lotion on face                                                        | Task: Apply lotion<br>Step 1: Walk to bathroom<br>Step 2: Turn to lotionbottle<br>Step 3: Grab lotionbottle                                                                                                                                                                                                                  |
| Task: Draw picture<br>Step 1: Walk to home office<br>Step 2: Walk to chair<br>Step 3: Find chair<br>Step 4: Sit on chair<br>Step 5: Find desk<br>Step 6: Open desk<br>Step 7: Find check<br>Step 8: Grab check<br>Step 9: Put check on desk<br>Step 10: Find pencil<br>Step 11: Grab pencil<br>Step 12: Close desk                                                                            | Task: Draw picture<br>Step 1: Walk to home office<br>Step 2: Walk to chair<br>Step 3: Find chair<br>Step 4: Sit on chair<br>Step 5: Find computer<br>Step 6: Switch on computer<br>Step 7: Turn to computer<br>Step 8: Look at computer<br>Step 9: Find keyboard<br>Step 10: Type on keyboard | Task: Draw picture<br>Step 1: Walk to home office<br>Step 2: Walk to wall<br>Step 3: Walk to drawing<br>Step 4: Find drawing<br>Step 5: Turn to drawing<br>Step 6: Look at drawing<br>Step 7: Touch drawing<br>Step 8: Pull drawing<br>Step 9: Push drawing                                                                  |
| Task: Prepare pot of boiling water<br>Step 1: Walk to dining room<br>Step 2: Walk to pot<br>Step 3: Find pot<br>Step 4: Grab pot<br>Step 5: Walk to sink<br>Step 6: Find faucet<br>Step 7: Switch on faucet<br>Step 8: Put pot on sink<br>Step 9: Grab pot<br>Step 10: Switch off faucet<br>Step 11: Grab pot<br>Step 12: Walk to oven<br>Step 13: Put pot on oven<br>Step 14: Switch on oven | Task: Prepare pot of boiling water<br>Step 1: Walk to kitchen<br>Step 2: Walk to sink<br>Step 3: Find sink<br>Step 4: Turn on tap<br>Step 5: Fill kettle with water<br>Step 6: Put kettle on stove<br>Step 7: Turn on stove<br>Step 8: Wait for water to boil                                 | Task: Prepare pot of boiling water<br>Step 1: Walk to kitchen<br>Step 2: Walk to cabinet<br>Step 3: Find pot<br>Step 4: Grab pot<br>Step 5: Walk to stove<br>Step 6: Find stove<br>Step 7: Switch on stove                                                                                                                   |
| Task: Look at mirror<br>Step 1: Walk to bathroom<br>Step 2: Walk to mirror<br>Step 3: Find mirror<br>Step 4: Turn to mirror<br>Step 5: Look at mirror                                                                                                                                                                                                                                         | Task: Look at mirror<br>Step 1: Walk to bathroom<br>Step 2: Walk to mirror<br>Step 3: Look at mirror                                                                                                                                                                                          | Task: Look at mirror<br>Step 1: Walk to bedroom<br>Step 2: Walk to mirror<br>Step 3: Find mirror<br>Step 4: Turn to mirror<br>Step 5: Look at mirror                                                                                                                                                                         |
| Task: Wipe down sink<br>Step 1: Walk to dining room<br>Step 2: Walk to rag<br>Step 3: Find rag<br>Step 4: Grab rag<br>Step 5: Walk to sink<br>Step 6: Wipe sink<br>Step 7: Put back rag                                                                                                                                                                                                       | Task: Wipe down sink<br>Step 1: Walk to kitchen<br>Step 2: Walk to sink<br>Step 3: Find sink<br>Step 4: Wipe down sink<br>Step 5: Return to kitchen                                                                                                                                           | Task: Wipe down sink<br>Step 1: Walk to bathroom<br>Step 2: Walk to cleaning solution<br>Step 3: Find cleaning solution<br>Step 4: Grab cleaning solution<br>Step 5: Find sink<br>Step 6: Pour cleaning solution into glasses<br>Step 7: Find faucet<br>Step 8: Switch on faucet<br>Step 9: Scrub sink<br>Step 10: Wash sink |

|                                                                                                                                                                                                                                                                                                                                                                                                                                                                    |                                                                                                                                                                                                                                                                                                                  |                                                                                                                                                                                                                                                                                               |
|--------------------------------------------------------------------------------------------------------------------------------------------------------------------------------------------------------------------------------------------------------------------------------------------------------------------------------------------------------------------------------------------------------------------------------------------------------------------|------------------------------------------------------------------------------------------------------------------------------------------------------------------------------------------------------------------------------------------------------------------------------------------------------------------|-----------------------------------------------------------------------------------------------------------------------------------------------------------------------------------------------------------------------------------------------------------------------------------------------|
| Task: Complete surveys on amazon turk<br>Step 1: Walk to chair<br>Step 2: Sit on chair<br>Step 3: Find computer<br>Step 4: Switch on computer<br>Step 5: Turn to computer<br>Step 6: Look at computer<br>Step 7: Find mouse<br>Step 8: Grab mouse<br>Step 9: Turn to computer<br>Step 10: Point at computer<br>Step 11: Find check<br>Step 12: Grab check<br>Step 13: Read check<br>Step 14: Put back mouse<br>Step 15: Find keyboard<br>Step 16: Type on keyboard | Task: Complete surveys on amazon turk<br>Step 1: Walk to home office<br>Step 2: Walk to chair<br>Step 3: Find chair<br>Step 4: Sit on chair<br>Step 5: Find computer<br>Step 6: Switch on computer<br>Step 7: Turn to computer<br>Step 8: Look at computer<br>Step 9: Find keyboard<br>Step 10: Type on keyboard | Task: Complete surveys on amazon turk<br>Step 1: Walk to home office<br>Step 2: Walk to desk<br>Step 3: Find chair<br>Step 4: Sit on chair<br>Step 5: Find computer<br>Step 6: Switch on computer                                                                                             |
| Task: Write book<br>Step 1: Walk to home office<br>Step 2: Walk to laptop<br>Step 3: Find laptop<br>Step 4: Grab laptop<br>Step 5: Find electrical outlet<br>Step 6: Plug in laptop<br>Step 7: Walk to love seat<br>Step 8: Sit on love seat<br>Step 9: Switch on laptop<br>Step 10: Find keyboard<br>Step 11: Type on keyboard                                                                                                                                    | Task: Write book<br>Step 1: Walk to home office<br>Step 2: Walk to chair<br>Step 3: Find chair<br>Step 4: Sit on chair<br>Step 5: Find computer<br>Step 6: Switch on computer<br>Step 7: Turn to computer<br>Step 8: Look at computer<br>Step 9: Find keyboard<br>Step 10: Type on keyboard                      | Task: Write book<br>Step 1: Walk to home office<br>Step 2: Walk to light<br>Step 3: Find light<br>Step 4: Switch on light<br>Step 5: Find pen<br>Step 6: Grab pen<br>Step 7: Find chair<br>Step 8: Sit on chair<br>Step 9: Turn to novel                                                      |
| Task: Paint ceiling<br>Step 1: Find drawing<br>Step 2: Turn to drawing<br>Step 3: Point at drawing<br>Step 4: Watch drawing<br>Step 5: Touch drawing<br>Step 6: Walk to bedroom                                                                                                                                                                                                                                                                                    | Task: Paint ceiling<br>Step 1: Walk to home office<br>Step 2: Walk to chair<br>Step 3: Find chair<br>Step 4: Sit on chair<br>Step 5: Find paint can<br>Step 6: Open paint can<br>Step 7: Pour paint into paint can<br>Step 8: Close paint can<br>Step 9: Find roller<br>Step 10: Roll paint onto ceiling         | Task: Paint ceiling<br>Step 1: Walk to home office<br>Step 2: Walk to ceiling<br>Step 3: Walk to painting<br>Step 4: Find painting<br>Step 5: Turn to painting<br>Step 6: Look at painting<br>Step 7: Touch painting<br>Step 8: Pull painting<br>Step 9: Push painting                        |
| Task: Change clothes<br>Step 1: Walk to bedroom<br>Step 2: Walk to dresser<br>Step 3: Open dresser<br>Step 4: Find dress<br>Step 5: Grab dress<br>Step 6: Put on dress<br>Step 7: Close dresser                                                                                                                                                                                                                                                                    | Task: Change clothes<br>Step 1: Walk to closet<br>Step 2: Open closet<br>Step 3: Find clothes<br>Step 4: Put on clothes<br>Step 5: Close closet                                                                                                                                                                  | Task: Change clothes<br>Step 1: Walk to bedroom<br>Step 2: Walk to dresser<br>Step 3: Find dresser<br>Step 4: Open dresser<br>Step 5: Find pants<br>Step 6: Grab pants<br>Step 7: Put on pants<br>Step 8: Find shirt<br>Step 9: Grab shirt<br>Step 10: Put on shirt<br>Step 11: Close dresser |

|                                                                                                                                                                                                                                                                                                    |                                                                                                                                                                                                                                                                                                         |                                                                                                                                                                                                                                                                     |
|----------------------------------------------------------------------------------------------------------------------------------------------------------------------------------------------------------------------------------------------------------------------------------------------------|---------------------------------------------------------------------------------------------------------------------------------------------------------------------------------------------------------------------------------------------------------------------------------------------------------|---------------------------------------------------------------------------------------------------------------------------------------------------------------------------------------------------------------------------------------------------------------------|
| Task: Make bed<br>Step 1: Walk to bedroom<br>Step 2: Walk to bed<br>Step 3: Find sheets<br>Step 4: Grab sheets<br>Step 5: Pull sheets                                                                                                                                                              | Task: Make bed<br>Step 1: Walk to bedroom<br>Step 2: Walk to bed<br>Step 3: Find bed<br>Step 4: Sit on bed<br>Step 5: Find sheet<br>Step 6: Pick up sheet<br>Step 7: Find pillow<br>Step 8: Pick up pillow<br>Step 9: Find blanket<br>Step 10: Pick up blanket                                          | Task: Make bed<br>Step 1: Stand up<br>Step 2: Walk to bedroom<br>Step 3: Walk to bed<br>Step 4: Turn to bed<br>Step 5: Put sheets on bed                                                                                                                            |
| Task: Read yourself to sleep<br>Step 1: Walk to bedroom<br>Step 2: Walk to novel<br>Step 3: Find novel<br>Step 4: Grab novel<br>Step 5: Find bed<br>Step 6: Sit on bed<br>Step 7: Find bookmark<br>Step 8: Grab bookmark<br>Step 9: Read novel<br>Step 10: Put bookmark on novel<br>Step 11: Sleep | Task: Read yourself to sleep<br>Step 1: Walk to home office<br>Step 2: Walk to chair<br>Step 3: Find chair<br>Step 4: Sit on chair<br>Step 5: Find computer<br>Step 6: Switch on computer<br>Step 7: Turn to computer<br>Step 8: Look at computer<br>Step 9: Find keyboard<br>Step 10: Type on keyboard | Task: Read yourself to sleep<br>Step 1: Walk to bedroom<br>Step 2: Walk to book<br>Step 3: Sit on chair<br>Step 4: Read check<br>Step 5: Sleep                                                                                                                      |
| Task: Hang keys<br>Step 1: Walk to bedroom<br>Step 2: Walk to dresser<br>Step 3: Find purse<br>Step 4: Grab purse<br>Step 5: Open purse<br>Step 6: Find keys<br>Step 7: Grab keys<br>Step 8: Find bowl<br>Step 9: Put keys on bowl<br>Step 10: Close purse<br>Step 11: Put back purse              | Task: Hang keys<br>Step 1: Walk to home office<br>Step 2: Walk to chair<br>Step 3: Find chair<br>Step 4: Sit on chair<br>Step 5: Find computer<br>Step 6: Switch on computer<br>Step 7: Turn to computer<br>Step 8: Look at computer<br>Step 9: Find keyboard<br>Step 10: Type on keyboard              | Task: Hang keys<br>Step 1: Walk to home office<br>Step 2: Walk to table<br>Step 3: Find keys<br>Step 4: Grab keys<br>Step 5: Walk to wall<br>Step 6: Find hanger<br>Step 7: Put keys on hanger                                                                      |
| Task: Eat cheese<br>Step 1: Walk to dining room<br>Step 2: Walk to freezer<br>Step 3: Open freezer<br>Step 4: Find cheese<br>Step 5: Grab cheese<br>Step 6: Eat cheese                                                                                                                             | Task: Eat cheese<br>Step 1: Walk to fridge<br>Step 2: Open fridge<br>Step 3: Find cheese<br>Step 4: Pick up cheese<br>Step 5: Walk to table<br>Step 6: Place cheese on table<br>Step 7: Close fridge<br>Step 8: Walk to chair<br>Step 9: Sit on chair<br>Step 10: Eat cheese                            | Task: Eat cheese<br>Step 1: Walk to dining room<br>Step 2: Walk to table<br>Step 3: Find table<br>Step 4: Turn to table<br>Step 5: Find chair<br>Step 6: Sit on chair<br>Step 7: Find food<br>Step 8: Grab food<br>Step 9: Find plate<br>Step 10: Put food on plate |
